# Supplementary material for: The development of chiral metal–organic frameworks for enantioseparation of racemates
Source: Royal Society of Chemistry journal article supplement (doi:10.1039/d3ra02489j), 2023-01-01
Supplement: d3ra02489j1.pdf [file d3ra02489j1.pdf]

## Development of Chiral Metal-Organic Frameworks for enantioseparation of Racemates

### *Supplementary material*

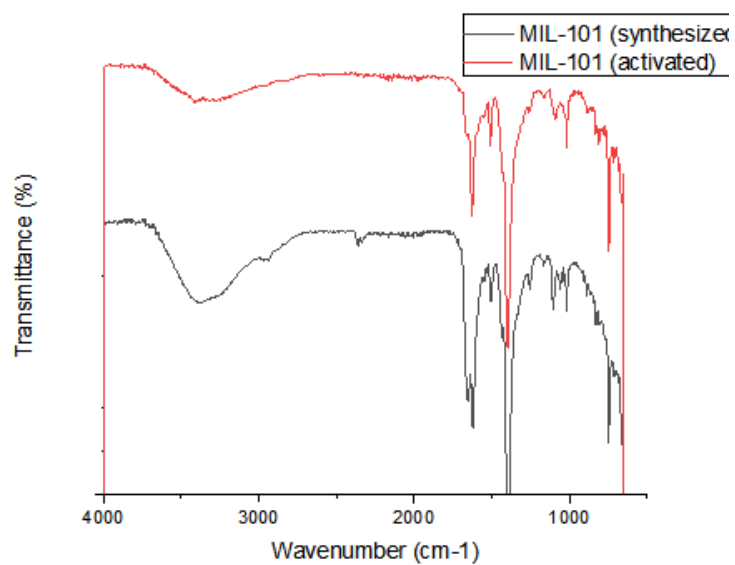

Fig. 1 FT-IR spectrum of MIL-101 (synthesized) and MIL-101 (Activated)

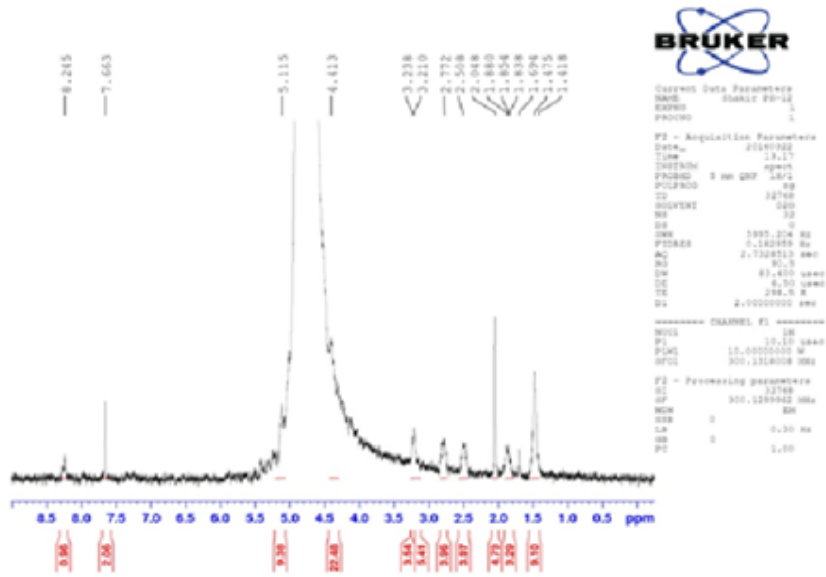

Fig. 2 <sup>1</sup>H NMR spectrum of CMOF-1

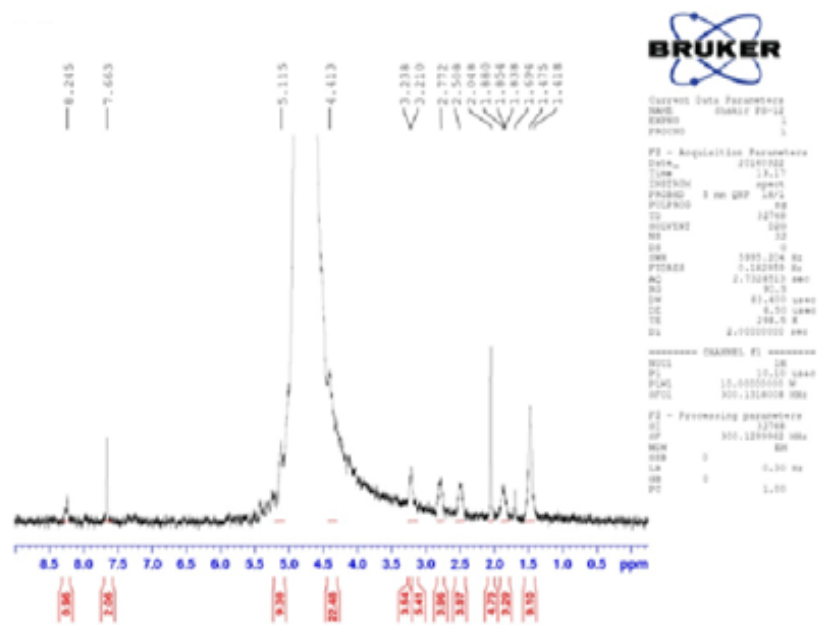

Fig. 3 <sup>1</sup>H NMR spectrum of CMOF-2

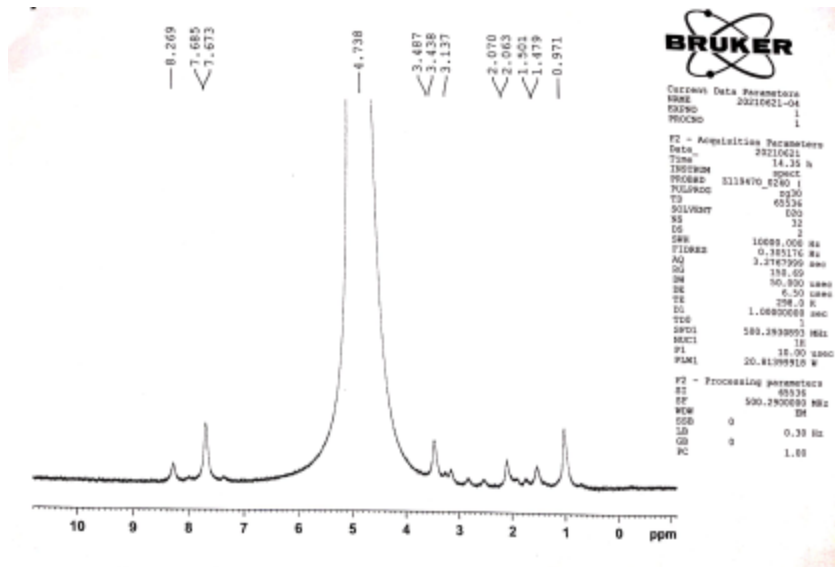

Fig. 4 <sup>1</sup>H NMR spectrum of CMOF-3

(a)

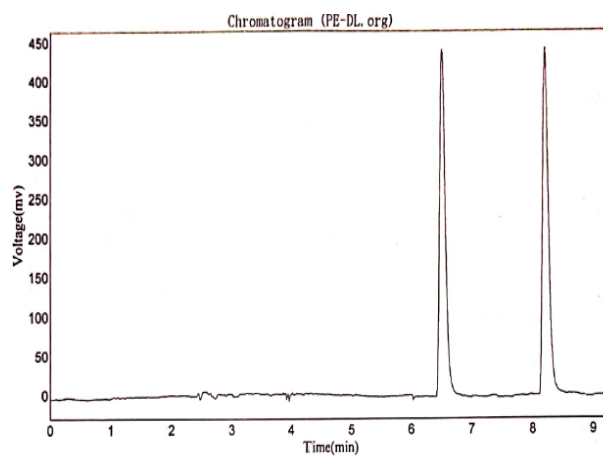

Results

| Peak No.     | Peak ID | Ret Time | Height     | Area        | Conc.    |
|--------------|---------|----------|------------|-------------|----------|
| 1            |         | 6.498    | 441833.156 | 2971522.500 | 49.0146  |
| 2            |         | 8.198    | 441579.031 | 3091001.750 | 50.9854  |
| <b>Total</b> |         |          | 883412.188 | 6062524.250 | 100.0000 |

(b)

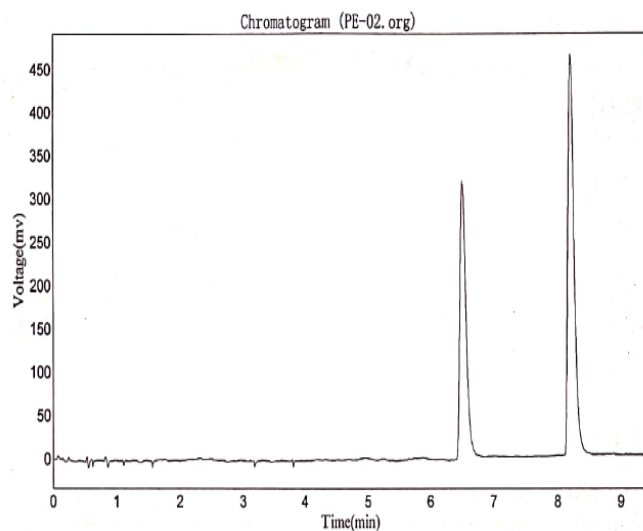

Results

| Peak No.     | Peak ID | Ret Time | Height     | Area        | Conc.    |
|--------------|---------|----------|------------|-------------|----------|
| 1            |         | 6.498    | 320514.563 | 2205822.250 | 40.8503  |
| 2            |         | 8.198    | 461251.938 | 3193953.750 | 59.1497  |
| <b>Total</b> |         |          | 781766.500 | 5399776.000 | 100.0000 |

(c)

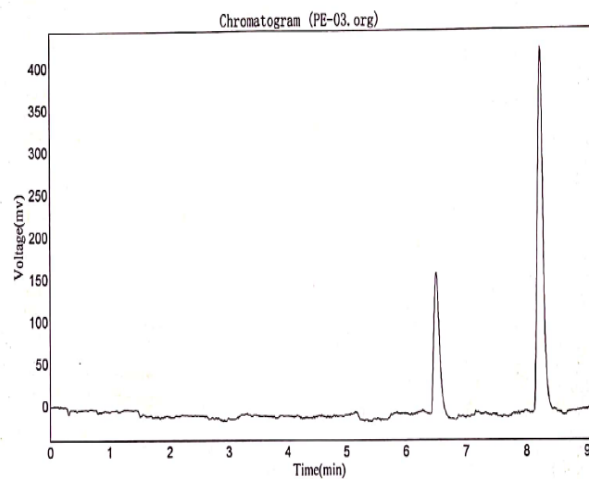

Results

| Peak No.     | Peak ID | Ret Time | Height     | Area        | Conc.    |
|--------------|---------|----------|------------|-------------|----------|
| 1            |         | 6.490    | 175018.297 | 1201740.000 | 28.6828  |
| 2            |         | 8.198    | 432839.969 | 2988023.000 | 71.3172  |
| <b>Total</b> |         |          | 607858.266 | 4189763.000 | 100.0000 |

Fig. 5 HPLC chromatograms of 1-Phenylethanol, (a). Racemic 1-Phenylethanol (b). 1-Phenylethanol after enantioseparation on CMOF-1 and CMOF-2 (c) 1-Phenylethanol after enantioseparation on CMOF-3

(a)

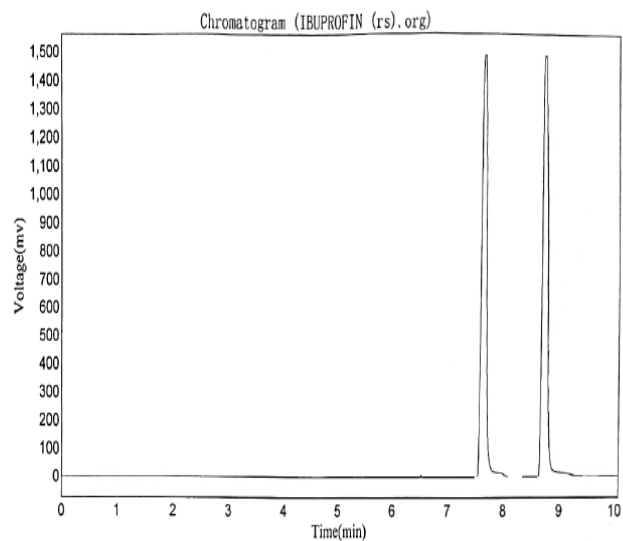

**Results**

| Peak No.     | Peak ID | Ret Time | Height      | Area         | Conc.    |
|--------------|---------|----------|-------------|--------------|----------|
| 1            |         | 7.632    | 1487116.000 | 9557257.000  | 48.2469  |
| 2            |         | 8.715    | 1484745.250 | 10251783.000 | 51.7531  |
| <b>Total</b> |         |          | 2971861.250 | 19809040.000 | 100.0000 |

(b)

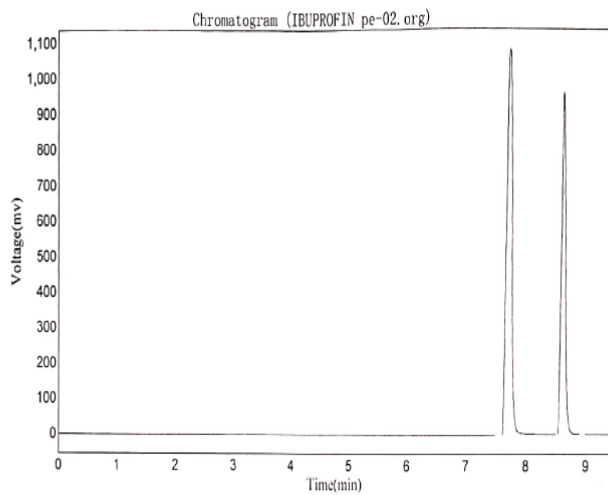

**Results**

| Peak No.     | Peak ID | Ret Time | Height      | Area         | Conc.    |
|--------------|---------|----------|-------------|--------------|----------|
| 1            |         | 7.698    | 1079644.500 | 6809969.000  | 60.2845  |
| 2            |         | 8.598    | 953001.438  | 4486406.000  | 39.7155  |
| <b>Total</b> |         |          | 2032645.938 | 11296375.000 | 100.0000 |

(c)

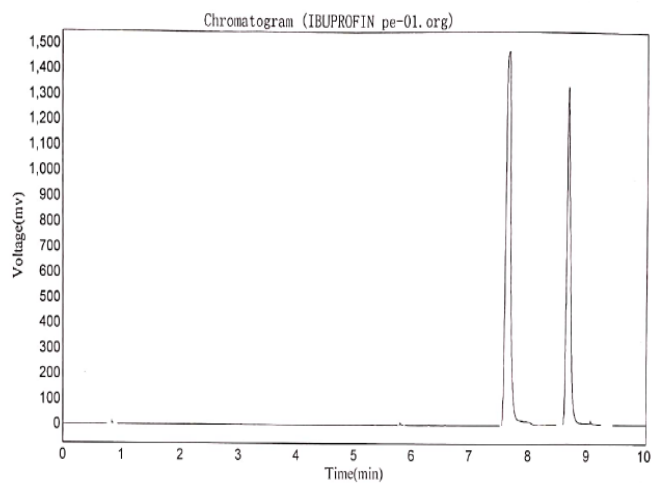

| Results      |         |          |             |              |          |
|--------------|---------|----------|-------------|--------------|----------|
| Peak No.     | Peak ID | Ret Time | Height      | Area         | Conc.    |
| 1            |         | 0.848    | 11650.622   | 13366.705    | 0.0885   |
| 2            |         | 5.807    | 8171.346    | 10964.377    | 0.0726   |
| 3            |         | 7.648    | 1470515.250 | 9000597.000  | 59.5719  |
| 4            |         | 8.665    | 1331122.250 | 6083856.000  | 40.2670  |
| <b>Total</b> |         |          | 2821459.468 | 15108784.082 | 100.0000 |

Fig. 6 HPLC chromatograms of Ibuprofen, (a).Racemic Ibuprofen (b).Ibuprofen after enantioseparation on CMOF-1 and 2(c). Ibuprofen after enantioseparation on CMOF-3

(a)

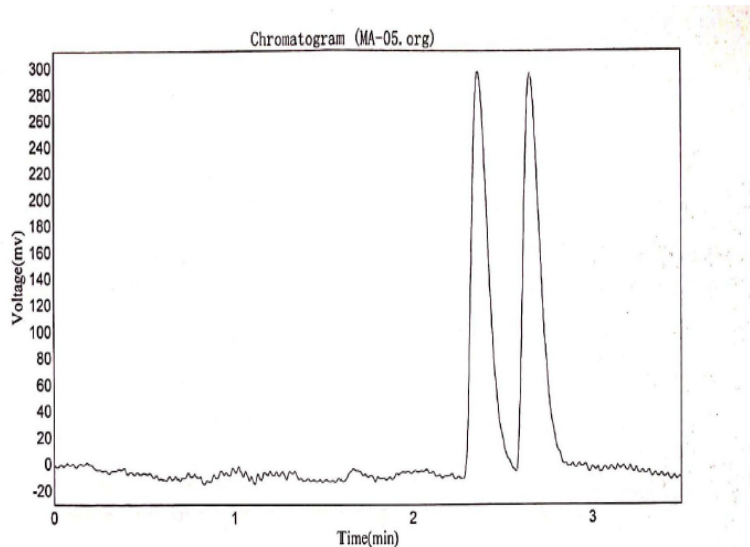

| Results      |         |          |            |             |          |
|--------------|---------|----------|------------|-------------|----------|
| Peak No.     | Peak ID | Ret Time | Height     | Area        | Conc.    |
| 1            |         | 2.365    | 307129.781 | 2061127.750 | 49.8766  |
| 2            |         | 2.657    | 304657.469 | 2071326.500 | 50.1234  |
| <b>Total</b> |         |          | 611787.250 | 4132454.250 | 100.0000 |

(b)

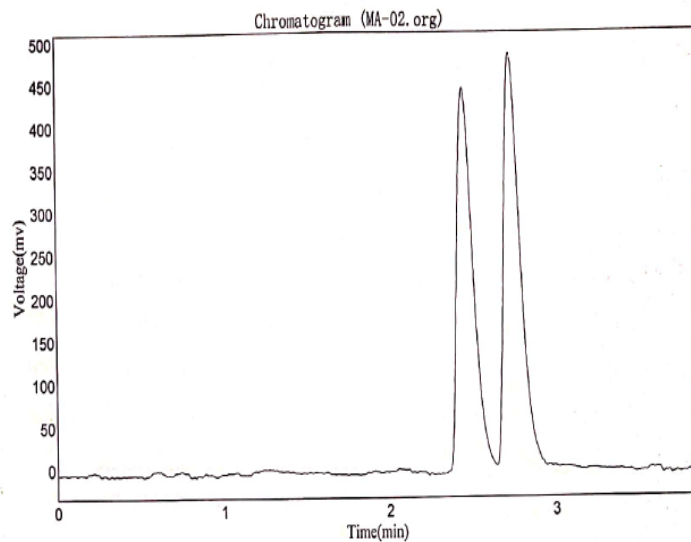

**Results**

| Peak No.     | Peak ID | Ret Time | Height     | Area        | Conc.    |
|--------------|---------|----------|------------|-------------|----------|
| 1            |         | 2.448    | 450548.813 | 3061013.250 | 47.2996  |
| 2            |         | 2.732    | 489339.000 | 3410523.250 | 52.7004  |
| <b>Total</b> |         |          | 939887.813 | 6471536.500 | 100.0000 |

(c)

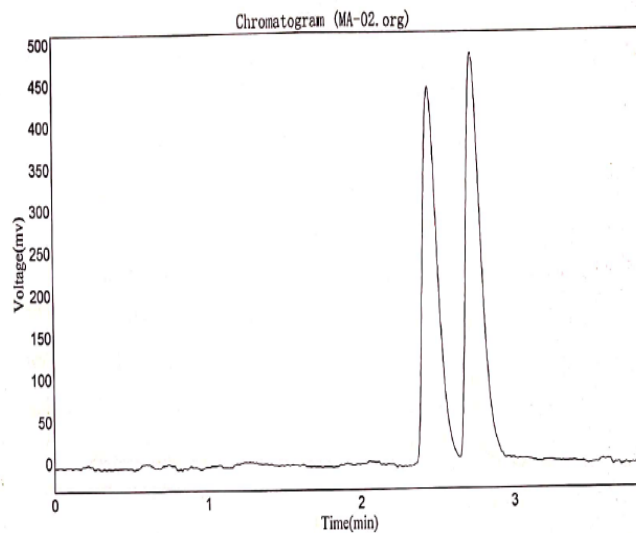

**Results**

| Peak No.     | Peak ID | Ret Time | Height     | Area        | Conc.    |
|--------------|---------|----------|------------|-------------|----------|
| 1            |         | 2.448    | 450548.813 | 3061013.250 | 47.2996  |
| 2            |         | 2.732    | 489339.000 | 3410523.250 | 52.7004  |
| <b>Total</b> |         |          | 939887.813 | 6471536.500 | 100.0000 |

(d)

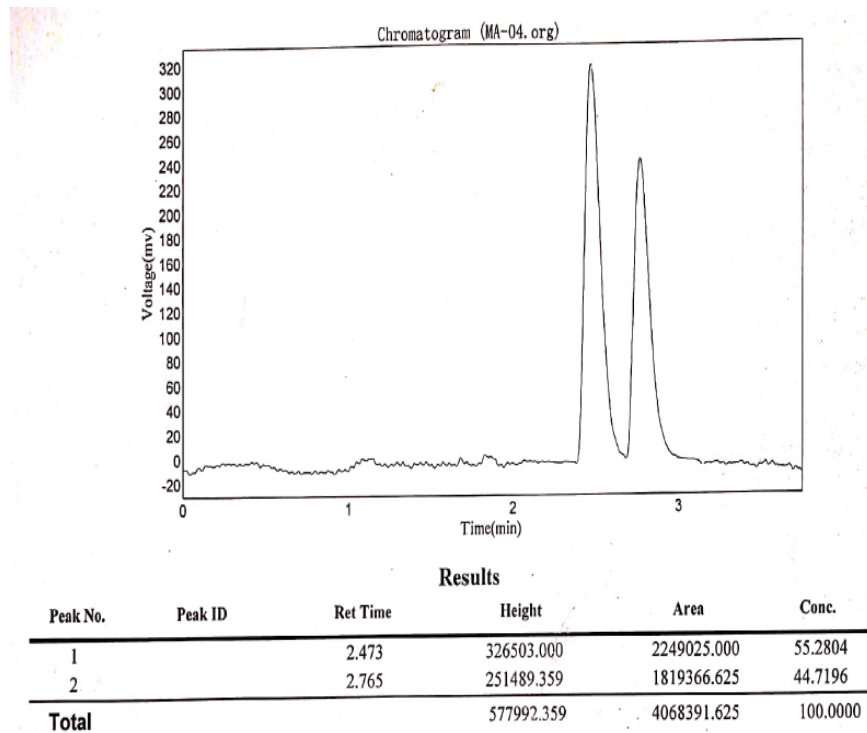

**Fig. 7** HPLC chromatograms of Mandelic acid, **(a)**.Racemic Mandelic acid**(b)**.Mandelic acid after enantioseparation on CMOF-1 **(c)**.Mandelic acid after enantioseparation on CMOF-2 **(d)**. Mandelic acid after enantioseparation on CMOF-3
